# Supplementary material for: little berries + forest bound winner
Source: Royal Society of Chemistry journal article supplement (doi:10.1039/b306878a), 2009-01-01
Supplement: b306878a.doc [file b306878a.doc]

**Experimental**

*Chemistry*

*General:* All reagents and chromatography grade solvents were obtained from commercial sources and used without further purification unless indicated. Flash column chromatography was performed on silica gel [Fluka Silica gel 60 220-440 mesh (35-70 mm)] and TLC was carried out using silica (0.2 mm, 60 F254) pre-coated, aluminium backed plates. Mass spectra were recorded on VG70-70 EQ (FAB, CI+, EI+) and MS50 (FAB) spectrometers, with only major peaks being reported. Melting points were determined on a Gallenkamp melting point apparatus and are uncorrected. The UV/VIS spectra were determined using a Hewlett-Packard HP8452 diode-array spectrophotometer. Elemental analyses were carried out by the Microanalytical department at UMIST and Manchester University and are within 0.3% of theoretical values. GC was carried out using a Perkin-Elmer 8500 Gas Chromatograph analyser with a CW20M column, 25m x 0.31mm (film thickness 0.17 mM). 1H NMR spectra were recorded at 300 MHz on a Bruker AC-300 instrument or at 400 MHz on a Bruker AC-400 MHz instrument. 13C NMR spectra were recorded at either 75.5 MHz on a Bruker AC-300 instrument or at 100 MHz on a Bruker AC-400 instrument. Chemical shifts (d) are quoted in ppm, relative to TMS and are referenced to the CDCl3 unless otherwise stated. Coupling constants (*J*) are reported to 1 decimal place. For 1,4-disubstituted compounds, only *J*A-B is given. *Z*-Nitro stilbene (**9a**) and the fluoro stilbenes (**10a**, **10b**) were prepared as previously described22,23.

## ***Z*- and *E*-1-(3’,4’,5’-Trimethoxyphenyl)-2-(3’’-*t*-butyldimethylsilyloxyphenyl)ethene (6a**, **6b)**

Procedure A: To a stirred slurry of 3,4,5-trimethoxybenzyltriphenylphosphonium bromide24 (**5**) (2 g, 3.8 mmol) in THF (15 ml) under argon was added *n*-butyllithium (4.6 mmol) at –15 C. The resulting red anion was stirred for 20 minutes and 3*-t-*butyldimethylsilyloxybenzaldehyde (0.9 g, 3.86 mmol) added. The resultant solution was allowed to reach room temperature and after 1 h was treated with water (5 ml). The aqueous layer was separated and extracted with ether (3 x 10 ml). The combined organic layers were washed with water (2 x 10 ml), brine (10 ml), dried (MgSO4) and concentrated *in vacuo*. Following flash column chromatography (petrol: EtOAc 19:1), *cis* stilbene **6a** was isolated as a colourless oil (360 mg, 24%). Rf = 0.64 (petrol: EtOAc 1:1). H (400 MHz) 0.13 [6 H, s, Si(CH3)2], 0.96 [9 H, s, (CH3)2], 3.70 [6 H, s, (OCH3­)2], 3.85 (3 H, s, OCH3), 6.49 (2 H, s, H-2’,6’), 6.52 (1 H, d, *J* = 12.1, olefinic H), 6.58 (1 H, d, *J* = 12.1, olefinic H), 6.71 (1 H, dt, *J* = 8.3, 1.9, H-4’’), 6.77 (1 H, t, *J* = 1.9, H-2’’), 6.91 (1 H, dt, *J* = 8.3, 1.9, H-6’’), 7.15 (1 H, t, *J* = 8.3, H-5’’). C (100 MHz) –4.2 (CH3), 18.6 (C), 26.0 (CH3), 56.2 (CH3), 61.2 (CH3), 106.4 (CH), 119.3 (CH), 120.6 (CH), 122.5 (CH), 129.6 (CH), 130.3 (CH), 130.6 (CH), 133.0 (C), 137.5 (C), 139.2 (C), 153.3 (C), 156.0 (C).

Further elution afforded *trans* stilbene **6b** as a colourless oil (122 mg, 8%). Rf = 0.61 (petrol: EtOAc 1:1). H (400 MHz, d6-acetone) 0.46 [6 H, s, Si(CH3)2], 1.04 [9 H, s, (CH3)3], 3.91 (3 H, s, OCH3), 3.96 [6 H, s, OCH3­)2], 6.76 (2 H, s, H-2’,6’), 6.78 (1 H, dt, *J* = 8.3, 1.1, H-4’’), 6.97 (2 H, s, olefinic H), 7.20 (1 H, dt, *J* = 8.3, 1.1, H-6’’), 7.21 (1 H, t, *J* = 1.1, H-2’’), 7.26 (1 H, t, *J* = 8.3, H-5’’).

***Z*- and *E*-1-(3’,4’,5’-Trimethoxyphenyl)-2-(3’’,4’’-dimethylphenyl)ethene** (**7a**, **7b)**

Stilbenes **7a** and **7b** were prepared from 3,4,5-trimethoxybenzyltriphenylphosphonium bromide (**5**) (3 g, 5.74 mmol) and 3,4-dimethylbenzaldehyde (0.77 g, 5.74 mmol) as in procedure A. Following flash column chromatography (petrol: EtOAc 19:1) and recrystallisation from EtOAc, *cis* stilbene **7a** was isolated as a white crystalline solid (690 mg, 40%). mp 65-7 C. Rf = 0.29 (petrol: EtOAc 1:1). H (400 MHz) 2.22 (3 H, s, CH3), 2.26 (3 H, s, CH3), 3.61 [6 H, s, (OCH3)2], 3.87 (3 H, s, OCH3), 6.46 (1 H, d, *J* = 12.1, olefinic H), 6.50 (2 H, s, H-2’,6’), 6.56 (1 H, d, *J* = 12.1, olefinic H), 7.04 (1 H, d, *J* = 8.3, H-5’’), 7.08 (1 H, dd, *J* = 8.3, 1.9, H-6’’), 7.12 (1 H, d, *J* = 1.9, H-2’’); C (100 MHz) 20.0 (CH3), 20.3 (CH3), 56.5 (CH3), 61.3 (CH3), 103.8 (CH), 124.4 (CH), 127.8 (CH), 128.1 (CH), 128.6 (CH), 130.4 (CH), 133.8 (C), 135.3 (C), 136.7 (C), 137.2 (C), 138.1 (C), 153.8 (C). *m/z* (EI+) 299 [(MH)+, 100%]. (Found: M+ 298.1576; C, 76.4; H, 7.6%. C19H22O3 requires M+ 298.1569; C, 76.5; H, 7.4%).

Further elution and recrystallisation from EtOAc afforded *trans* stilbene **7b** as a cream crystalline solid (416 mg, 24%). mp 113-115 C. Rf = 0.21 (petrol: EtOAc 1:1). H (400 MHz) 2.30 (3 H, s, CH3), 2.32 (3 H, s, CH3), 3.90 (3 H, s, OCH3), 3.95 [6 H, s, (OCH3)2], 6.77 (2 H, s, H-2’,6’), 6.99 (1 H, d, *J* = 16.6, olefinic H), 7.03 (1 H, d, *J* = 16.6, olefinic H), 7.15 (1 H, d, *J* = 8.3, H-5’’), 7.28 (1 H, dd, *J* = 8.3, 1.9, H-6’’), 7.33 (1 H, d, *J* = 1.9, H-2’’); C (100 MHz) 19.9 (CH3), 20.1 (CH3), 56.2 (CH3), 61.3 (CH3), 106.4 (CH), 126.7 (CH), 129.6 (CH), 129.9 (CH), 130.4 (CH), 130.5 (CH), 133.2 (C), 135.2 (C), 136.0 (C), 136.7 (C), 137.5 (C), 153.2 (C). *m/z* (EI+) 299 [(MH)+, 100%]. (Found: M+ 298.1565; C, 76.4; H, 7.5%. C19H22O3 requires M+ 298.1569; C, 76.5; H, 7.4%).

***Z*- and *E*-1-(3’,4’,5’-Trimethoxyphenyl)-2-(3’’-bromo-4’’-methoxyphenyl)ethene** **(8a**, **8b)**

Stilbenes **8a** and **8b** were prepared from 3,4,5-trimethoxybenzyltriphenylphosphonium bromide (**5**) (10 g, 19.1 mmol) and 3-bromo-4-methoxybenzaldehyde (4.11 g, 19.1 mmol) as in procedure A. Following flash column chromatography (petrol:EtOAc 19:1) and recrystallisation from EtOAc, *cis* stilbene **8a** was isolated as a white solid (700 mg, 10%). mp 101-103 C. Rf = 0.30 (petrol: EtOAc 8:3). H (300 MHz) 3.72 [6 H, s, (OCH3)2], 3.87 (3 H, s, OCH3), 3.91 (3 H, s, OCH3), 6.43 (1 H, d, *J* = 12.1, olefinic H), 6.49 (1 H, d, *J* = 12.1, olefinic H), 6.53 (2 H, s, H-2’,6’), 6.79 (1 H, d, *J* = 8.3, H-5’’), 7.22 (1 H, dd, *J* = 8.3, 1.9, H-6’’), 7.56 (1 H, d, *J* = 1.9, H-2’’); C (100 MHz) 56.4 (CH3), 56.6 (CH3), 61.3 (CH3), 106.3 (CH), 111.5 (C), 111.8 (CH), 128.3 (CH), 129.7 (CH), 130.3 (CH), 131.4 (C), 132.6 (C), 134.0 (CH), 137.8 (C), 153.4 (C), 155.3 (C). max (MeOH) = 291 ( = 13,394). *m/z* (FAB) 378 (M+, 100%). (Found: M+ 378.0472; C, 56.9; H, 5.0%. C18H19O479Br requires M+ 378.0467; C, 57.0; H, 5.05%).

Further elution and recrystallisation from EtOAc afforded *trans* stilbene **8b** as a white crystalline solid (530 mg, 7%). mp 152-153 C. Rf = 0.22 (petrol:EtOAc 8:3). H (300 MHz) 3.88 (3 H, s, OCH3), 3.92 [6 H, s, (OCH3)2], 3.93 (3 H, s, OCH3), 6.73 (2 H, s, H-2’,6’), 6.91 (1 H, d, *J* = 8.3, H-5’’) 6.92 (2 H, s, olefinic H), 7.40 (1 H, dd, *J* = 1.9, 8.3, H-6’’), 7.75 (1 H, d, *J* = 1.9, H-2’’); C (100 MHz) 56.5 (CH3), 56.7 (CH3), 61.4 (CH3), 103.8 (CH), 112.3 (C), 112.4 (CH), 126.6 (CH), 127.2 (CH), 128.2 (CH), 131.3 (CH), 131.9 (C), 133.3 (C), 138.3 (C), 153.8 (C), 155.7 (C). max (MeOH) = 326 ( = 26,195). *m/z* (FAB) 378 (M+, 100 %). (Found: M+ 378.0468; C, 57.3; H, 4.9%. C18H19O479Br requires M+ 378.0467; C, 57.0; H, 5.05%).

***E*-1-(3’,4’,5’-Trimethoxyphenyl)-2-(4”-methyl-3’’-nitrophenyl)ethane (9b)**

To a stirred slurry of 3,4,5-trimethoxybenzyltriphenylphosphonium bromide24 (**5**) (2 g, 3.8 mmol) in THF (15 ml) under argon was added a solution of sodium bis(trimethylsilyl)amide in THF (4.2 ml, 4.2 mmol) at –15 C. A solution of 4-methyl-3-nitrobenzaldehyde (0.63 g, 3.63 mmol) in THF (2 ml) was added and the mixture stirred for 0.5 h at RT. Treated as described in procedure A and chromatographed using petrol: ethyl acetate 9:1 to 4:1 to yield the title stilbene (**9a**) as a yellow solid (153 mg, 12%). mp 148-50 C. H (300 MHz) 2.61 (3 H, s, Me), 3.87 (3 H, s, OMe), 2.92 (6 H, s, 2 x OMe), 6.74 (2 H, s, 2’,6’-H), 6.98 (1 H, d, *J* 16.0, C=CH), 7.07 (1 H, d, *J* 16.0, C=CH), 7.32 (1 H, d, *J* 8.1, 5”-H), 7.60 (1 H, dd, *J* 8.1, 2.0, 6”-H), 8.10 (1 H, d, *J* 2.0, 2”-H). *m/z* (EI+) 329 (100). Found: M+ 329.1264. C18H19NO5 requires 329.1263.

***Z*-1-(3’,4’,5’-Trimethoxyphenyl)-2-(3’’-hydroxyphenyl)ethene** **(11a)**

Procedure B. To a stirred solution of TBDMS ether **6a** (360 mg, 0.978 mmol) in dry THF (20 ml) was added tetra-*n*-butylammonium fluoride (3 ml of 1 M solution in THF, 3 mmol). The resulting yellow solution was stirred for 20 minutes and treated with water (30 ml). The aqueous layer was separated, extracted with chloroform (3 x 25 ml) and the combined organic layers were washed with water (2 x 25 ml), brine (25 ml), dried (MgSO4) and concentrated *in vacuo*. Following flash column chromatography (petrol: EtOAc 7:3) and recrystallisation from EtOAc, phenol **11a** was isolated as a cream solid (140 mg, 78%). mp 82-84 C. Rf = 0.42 (petrol: EtOAc 1:1). H (400 MHz) 3.60 [6 H, s, (OCH3)2], 3.87 (3 H, s, OCH3), 5.04 (1 H, s, OH), 6.50 (1 H, d, *J* = 12.1, olefinic H), 6.51 (2 H, s, H-2’,6’), 6.57 (1 H, d, *J* = 12.1, olefinic H), 6.71 (1 H, dt, *J* = 8.3, 1.1, H-4’’), 6.80 (1 H, t, *J* = 1.1, H-2’’), 6.89 (1 H, dt, *J* = 8.3, 1.1, H-6’’), 7.15 (1 H, t, *J* = 8.3, H-5’’). C (100 MHz) 56.3 (CH3), 61.3 (CH3), 106.5 (CH), 114.5 (CH), 115.8 (CH), 121.9 (CH), 129.9 (CH), 130.0 (CH), 130.9 (CH), 132.7 (C), 137.6 (C), 139.4 (C), 153.3 (C), 155.9 (C). max (MeOH) = 296 ( = 8,063). *m/z* (EI+) 287 [(MH)+, 90%], 142 (100%). (Found: M+ 286.1202. C17H18O4 requires M+ 286.1205).

***E*-1-(3’,4’,5’-Trimethoxyphenyl)-2-(3’’-hydroxyphenyl)ethene****(11b)**

Stilbene **11b** was prepared from *trans* TBDMS ether **6b** (100 mg, 0.25 mmol) as in procedure B. Following flash column chromatography (petrol: EtOAc 7:3) and recrystallisation from EtOAc, phenol **11b** was isolated as a cream solid (40 mg, 56%). mp 73-75 C. Rf = 0.54 (petrol: EtOAc 7:3). H (400 MHz) 3.93 (3 H, s, OCH3), 3.97 [6 H, s, (OCH3­)2], 5.15 (1 H, s, OH), 6.76 (2 H, s, H-2’,6’), 6.78 (1 H, dt, *J* = 8.3, 1.1, H-4’’), 6.98 (1 H, d, *J* = 16.0, olefinic H), 7.03 (1 H, t, *J* = 1.1, H-2’’), 7.04 (1 H, d, *J* = 16.0, olefinic H), 7.14 (1 H, dt, *J* = 8.3, 1.1, H-6’’), 7.24 (1 H, t, *J* = 8.3, H-5’’). max (MeOH) = 320 ( = 25,379); *m/z* (EI+) 287 [(MH)+, 100%]. (Found: M+ 286.1210. C17H18O4 requires 286.1205).

***Z*- and *E*-1-(3’,4’,5’-Triethoxyphenyl)-2-(4”-methoxyphenyl)ethene (14a**, **14b)**

Using procedure A stilbenes **14a** and **14b** were prepared from 3,4,5-triethoxybenzyltriphenylphosphonium bromide (**12**) (1 g, 1.62 mmol) and 4-methoxybenzaldehyde (0.22g, 1.6mmol). Flash chromatography afforded the *cis* stilbene **14a** as a pale yellow oil (0.17 g, 31%). Rf = 0.43 (petrol: EtOAc 7:3).  δH (300 MHz) 1.35 (6 H, t, *J* = 7.16, CH3), 1.36 (3 H, t, *J =* 7.06, CH3), 3.80 (3 H, s, OCH3), 3.91 (4 H, q, *J* = 7.16, OCH2), 4.07 (2 H, q, *J* = 7.06, OCH2), 6.50 (2 H, d, *J =* 12.43, olefinic H), 6.79 (2 H, d, *J*  = 8.7, 3”, 5”-H), 7.26 (2 H, d, *J* = 8.7, 2”, 6”-H). *m/z* (FAB) 342 [(M+) 100%]. (Found: C, 73.9; H, 7.9%; C12H26O4 requiresC, 73.7; H, 7.65%).

Further elution afforded the *trans* stilbene **14b** as pale yellow crystals (0.12 g, 22%). mp 97-99oC. Rf = 0.48 (petrol: EtOAc 7:3). H (300 MHz) 1.38 (3 H, t, *J* = 7.2, CH3), 1.47 (6 H, t, *J* = 6.8, CH3), 3.85 (3 H, s, OCH3), 4.08 – 4.19 (6 H, m, OCH2), 6.91 (2 H, d, *J* = 16.2, olefinic H), 6.92 (2 H, d, *J* = 8.2, 3”, 5”-H), 7.45 (2 H, d, *J* = 8.2, 2”, 6”-H). *m/z* (FAB) 342 [(M+) 100%], (Found: C, 73.9; H, 7.9%. C12H26O4 requires C, 73.7; H, 7.65%).

***Z*- and *E*-1-(3’,4’,5’-Triethoxyphenyl)-2-(3”-t-butyldimethylsilyloxy-4”-methoxyphenyl)ethene** **(17a**, **17b)**

The stilbenes **17a** and **17b** were prepared from 3,4,5-triethoxybenzyltriphenylphosphonium bromide (2 g, 3.24 mmol) and 3-*t*-butyldimethylsilyloxy-4-methoxybenzaldehyde (0.86 g, 3.24 mmol) according to procedure A. Flash column chromatography afforded the *cis* stilbene **17a** as a colourless oil (0.23 g, 15%). Rf = 0.65 (petrol: EtOAc 9:1). H (300 MHz) 0.08 (6 H, s, Si(CH3)2), 0.95 (9H, s, CH3), 1.35 – 1.45 (9 H, m, CH3), 3.79 (3 H, s, OCH3), 3.91 (4 H, q, *J =* 6.8, OCH2), 4.06 (2 H, q, *J =* 7.2, OCH2), 6.40 (1 H, d, *J =* 12.06, olefinic H), 6.43 (1 H, d, *J =* 12.06, olefinic H), 6.74 (2 H, s, H 2’,6’), 6.83 (1 H, dd, *J =* 8.03, 2.06, H 6”), 6.84 (1 H, d, *J =* 8.03, H 5”), 6.88 (1 H, d, *J =* 2.06, H 2”).

Further elution gave the *trans* stilbene **17b** as white crystals (0.27 g, 18%). Rf = 0.75. H (300 MHz) 0.20 (6 H, s, Si(CH3)2), 1.03 (9 H, s, CH3), 1.37 (3 H, t, *J =* 7.5, CH3), 1.46 (6 H, t, *J =* 7.2, CH3), 3.85 (3 H, s, OCH3), 4.08 –4.20 (6 H, m, OCH2), 6.73 (2H, s, H 2’,6’), 6.84 (1 H, dd, J =8.0, 2.1, H 6”), 6.90 (1 H, d, *J =* 15.7, olefinic H), 7.04 (1 H, d, *J =* 8.0, H 5”), 7.05 (1 H, d, *J =* 15.7, olefinic H), 7.66 (1 H, d, *J =* 2.0, H 2”).

***Z-*1-(3,4,5-Triethoxyphenyl)-2-(3’-hydroxy-4’-methoxyphenyl)ethene (18a)**

Using procedure B *Z*-1-(3’,4’,5’-triethoxyphenyl)-2-(3”-*t*-butyldimethylsiloxy-4”-methoxy)ethane **17a** (0.23 g, 0.48 mmol) afforded phenol **18a** as a colourless oil (0.08 g, 46%). H (300 MHz) 1.30 –1.40 (9 H, m, CH3), 3.87 (3 H, s, OCH3), 3.92 (4 H, q, *J =* 7.2, OCH2), 4.06 (2 H, q, *J =* 7.2, OCH2), 6.40 (1 H, d, *J =* 12.4, olefinic H), 6.45 (1 H, d, *J =* 12.4, olefinic H), 6.50 (2 H, s, H 2’,6’), 6.75 ( 1 H, d, *J =* 8.1, H 5”), 6.79 (1 H, dd, *J =* 8.1, 1.88, H 6”), 6.91 (1 H, d, *J =* 1.9, H 2”). *m/z* (FAB) 358 [(M+) 100%]. (Found: M+ 358.1780. C21H26O5 requires M+ 358.1780).

***E-*1-(3’,4’,5’-Triethoxyphenyl)-2-(3”-hydroxy-4”-methoxyphenyl)ethene (18b)**

Using procedure B *E*-1-(3’,4’,5’-triethoxyphenyl)-2-(3”-*t*-butyldimethylsiloxy-4”-methoxy)ethene **17b** (0.27 g, 0.57 mmol) afforded phenol **18b** as white crystals (0.09 g, 47%). mp 91–92 oC. Rf = 0.11. H (300 MHz) 1.37 (3 H, t, *J =* 6.0, CH3), 1.46 (6 H, t, *J =* 6.4, CH3), 3.92 (3 H, s, OCH3), 4.08 –4.20 (6 H, m, OCH2), 6.71 (2 H, s, H 2’, 6’), 6.84 (1 H, d, *J =* 7.9, H 5”), 6.85 (1 H, d, *J =* 15.5, olefinic H), 6.91 (1 H, dd, *J =* 8.0, 2.3, H 6”), 7.11 (1 H, d, *J =* 15.45, olefinic H), 7.13 (1H, d, *J =* 2.26, H 2”). *m/z* (FAB) 358 [(M+) 100%]. (Found: M+ 358.1780. C21H26O5 requires M+ 358.1780).

***Z*- and *E-*1-(3’,4’,5’-Triethoxyphenyl)-2-(3”-fluoro-4”-methoxyphenyl)ethene (15a**, **15b)**

The stilbenes **15a** and **15b** were prepared from 3,4,5-triethoxybenzyltriphenylphosphonium bromide **12** (2 g, 3.24 mmol) and 3-fluoro-4-methoxybenzaldehyde (0.50 g, 3.24 mmol) according to procedure A. Flash column chromatography (petrol: EtOAc 20:1) afforded the *cis* isomer **15a** as a pale yellow oil (0.35 g, 29%). Rf = 0.16; H (300 MHz) 1.30 – 1.40 (9 H, m, CH3), 3.87 (3 H, s, OCH3), 3.92 (4 H, q, *J =* 7.2, CH2), 4.07 (2 H, q, *J =* 6.8, CH2), 6.41 (1 H, d, *J =* 12.4, olefinic H), 6.47 (1 H, d, *J =* 12.4, olefinic H), 6.47 (2 H, s, H 2’, 6’), 6.82 (1 H, t, *J =* 8.7, H 5”), 7.00 (1 H, dd, *J =* 8.7, 1.53, H 6”), 7.07 (1 H, dd, *J =* 12.1, 1.5, H 2”). *m/z* (FAB) 360 [(M+) 85%], 135 (100%). (Found: M+ 360.1737, C, 70.0; H, 7.0; F, 5.3%. C21H25O4F requires M+ 360.1737; C, 70.2; H, 7.1; F, 5.5%).

Further elution afforded the *trans* isomer **15b** as white needle crystals (0.27 g, 23 %). mp 105-107oC. Rf = 0.22. H (300 MHz) 1.38 (6 H, t, *J =* 7.2*,* CH3), 1.46 (3 H, t, *J =* 7.2, CH3) 3.92(3 H, s, OCH3), 4.07 –4.20 (6 H, m, CH2), 6.71 (2 H, s, H 2’, 6’) 6.91 (1 H, d, *J =* 17.0, olefinic H), 6.94 (1 H, t, *J =* 8.7, H 5”), 6.95 (1 H, d, *J =* 17.0, olefinic H), 7.17 (1 H, dd, *J =* 8.7, 1.53, H 6”), 7.25 (1 H, dd, *J =* 12.1, 1.53, H 2”). *m/z* (FAB) 360 [(M+) 100%]. (Found: M+ = 360.1737, C, 70.2; H, 7.1; F, 5.5%. C21H25O4F requires M+ 360.1737; C, 70.0; H, 7.0; F, 5.3%).

***Z*- and *E-*1-(3’,4’,5’-Triethoxyphenyl)-2-(3”-bromo-4”-methoxyphenyl)ethene (13a**, **13b)**

The stilbenes **13a** and **13b** were prepared from 3,4,5-triethoxybenzyltriphenylphosphonium bromide **12** ( 2g, 3.24 mmol) and 3-bromo-4-methoxybenzaldehyde (0.69 g, 3.24 mmol) according to procedure A. Flash chromatography (petrol: EtOAc 10:1) afforded*E-*1-(3’,4’,5’-triethoxyphenyl)-2-(3”-bromo-4”-methoxyphenyl)ethene (**13b**) as white crystals (0.61 g, 46%). mp 107-109oC. Rf = 0.27. H (300 MHz) 1.38 (3 H, t, *J =* 6.8, CH3), 1.46 (6 H, t, *J* = 6.0, CH3), 3.93 (3 H, s, OCH3), 4.08 – 4.20 (6 H, m, OCH2), 6.67 (1 H, d, *J =* 16.5, olefinic H), 6.71 (2 H, s, H 2’,6’), 6.85 (1 H, d, *J =* 16.5, olefinic H), 6.91 (1 H, d, *J =* 8.0, H 5”), 7.38 (1 H, dd, *J =* 8.0, 1.9, H 6”), 7.37 (1 H, d, *J =* 1.9, H 2”). *m/z* (FAB) 422 [(M+) 85%], 444 (100%). (Found: M+ 420.0936, C, 60.0; H, 6.1%. C21H25O4Br requires M+ 420.0936; C, 59.9; H, 6.0%).

Further elution afforded the *Z*-isomer **13a** as a pale yellow oil (0.59 g, 45.3%). Rf = 0.18. H (300 MHz) 1.32 – 1.40 (9 H, m, CH3), 3.88 (3 H, s, OCH3), 3.92 (4 H, q, *J =* 7.3, OCH2), 4.07 (2 H, q, *J =* 7.16, OCH2), 6.40 (1 H, d, *J =* 12.8, olefinic H), 6.46 (1 H, d, *J =* 12.1, olefinic H), 6.48 (2 H, s, H 2’,6’), 6.77 (1 H, d, *J =* 8.29, H 5”), 7.19 (1 H, dd, *J =* 8.29, 2.26, H 6”), 7.53 (1 H, d, *J* = 2.3, H2”). *m/z* (FAB) 422 [(M+) 100%]. (Found: C, 60.0; H, 6.1%. C21H25O4Br requires C, 59.9; H, 6.0%).

***Z*- and *E-*1-(3’,4’,5’-Trimethoxyphenyl)-2-(3”-chloro-4”-methoxyphenyl)ethene** **(16a**, **16b)**

The stilbenes **16a** and **16b** were prepared from 3,4,5-triethoxybenzyltriphenylphosphonium bromide **12** (1 g, 1.62 mmol) and 3-chloro-4-methoxybenzaldehyde (0.27 g, 1.62 mmol) using procedure A. Flash chromatography gave *Z*-stilbene **16a** as a clear oil (0.08 g, 46%). Rf = 0.24. H (300 MHz) 0.95 (9 H, s, CH3), 1.35 (9 H, m, CH3), 3.79 (3 H, s, OCH3), 3.91 (4 H, q, *J =* 6.8, OCH2), 4.06 (2 H, q, *J =* 7.2, OCH2), 6.40 (1 H, d, *J =* 12.1, olefinic H), 6.43 (1 H, d, *J =* 12.1, olefinic H), 6.74 (2 H, s, H 2’,6’), 6.83 (1 H, dd, *J =* 8.0, 2.1, H 6”), 6.84 (1 H, d, *J =* 8.0, H 5”), 6.88 (1 H, d, *J =* 2.1, H 2”). (Found: C, 67.1; H, 6.8; Cl, 8.6%. C21H25O4Cl requires C, 66.9; H, 6.7; Cl, 8.4%).

Further elution gave the *E*-stilbene **16b** as white crystals (0.09 g, 46.6%). mp 105-106oC. Rf = 0.11. H (300 MHz) 1.37 (3 H, t, *J =* 6.03, CH3), 1.46 (6 H, t, *J =* 6.4, CH3), 3.92 (3 H, s, OCH3), 4.12 (6 H, m, OCH2), 6.71 (2 H, s, H 2’, 6’), 6.84 (1 H, d, *J =* 7.9, H 5”), 6.85 (1 H, d, *J =* 15.5, olefinic H), 6.91 (1 H, dd, *J =* 7.98, 2.26, H 6”), 7.11 (1 H, d, *J =* 15.45, olefinic H), 7.13 (1 H, d, *J =* 2.3, H 2”). (Found: C, 67.1; H, 6.8; Cl, 8.6%. C21H25O4Cl requires C, 66.9; H, 6.7; Cl, 8.4%).

***E*-2-(4’-Methoxyphenyl)-3-(3’’,4’’,5’’-trifluorophenyl)prop-2-enoic acid (26)**

Procedure C. A mixture of 4-methoxyphenylacetic acid (4.41 g, 26.5 mmol) and 3,4,5-trifluorobenzaldehyde (**19**) (2.12 g, 13.3 mmol) (2 g, 8.84 mmol), acetic anhydride (12 ml) and triethylamine (6 ml) were heated under reflux for 3 h. After acidification with concentrated hydrochloric acid (6 ml), the resulting solid was filtered off. Recrystallisation from aqueous acetic acid afforded cinnamic acid **26** as a yellow powder (3.18 g, 78%). mp 155-160 C. H (300 MHz, DMSO) 3.93 (3 H, s, OCH3), 6.91-7.00 (4 H, m, H-3’,5’,2’,6’), 7.09 (2 H, dd, J = 8.3, 6.0, H-2’’,6’’), 7.65 (1 H, s, olefinic H), 12.89 (1 H, s, OH). C (100 MHz, DMSO) 55.7 (CH3), 114.6 (CH), 114.8 (dd, J = 15.5, 5.8, CH), 127.3 (C), 131.0 (CH), 132.1 (dd, J = 5.8, 3.9, C), 135.6 (q, J = 1.9, CH), 138.9 (dt, J = 254.0, 15.5, C), 150.2 (ddd, J = 254.0, 10.6, 2.9, C), 152.9 (C), 159.4 (C), 168.4 (C). *m/z* (FAB)308 (M+, 100%). max (MeOH) = 263 ( = 9,896). (Found: C, 62.6; H, 3.3; C16H11F3O3 requires C, 62.3; H, 3.6 %).

***Z*- and *E*-1-(3’,4’,5’-Trifluorophenyl)-2-(4’’-methoxyphenyl)ethene 25a**, **(25b)**

Procedure D: Cinnamic acid **26** (1 g, 3.25 mmol) was added to powdered copper25 (1.08 g, 16.7 mmol) in quinoline (11.7 ml, 12.8 g, 0.1 mol) and the resulting mixture was heated at 200 °C for 2 h. Upon cooling, ether was added and the copper filtered off through celite. The filtrate was washed with 1 M hydrochloric acid (2 x 100 ml), the aqueous layer separated and extracted with ether (3 x 50 ml). The combined organic layers were washed with saturated aqueous sodium carbonate (50 ml), water (2 x 50 ml), brine (50 ml), dried (MgSO4) and concentrated *in vacuo*. Flash column chromatography (petrol: EtOAc 19:1) afforded *Z* stilbene **25a** as a colourless solid (180 mg, 21%). mp 40-41 C. Rf = 0.56 (petrol: EtOAc 3:1). H (300 MHz) 3.83 (3 H, s, OCH3), 6.34 (1 H, d, *J* = 12.1, olefinic H), 6.62 (1 H, d, *J* = 12.1, olefinic H), 6.80 (2 H, d, *J* = 8.7, H-3’’,5’’), 6.86 (2 H, dd, *J* = 8.3, 6.0, H-2’,6’), 7.15 (2 H, d, *J* = 8.7, H-2’’,6’’). C (100 MHz) 55.6 (CH3), 113.1 (dd, *J* = 15.5, 5.8, CH), 114.3 (CH), 126.0 (q, *J* = 1.9, CH), 128.7 (C), 130.5 (CH), 132.4 (CH), 134.0 (dd, *J* = 5.8, 3.9, C), 139.0 (dt, *J* = 254.0, 15.5, C), 151.5 (ddd, *J* = 254.0, 10.6, 2.9, C), 160.3 (C). *m/z* (FAB) 264 (M+, 100%). (Found: M+ 264.0765; C, 68.4; H, 3.9%. C15H11OF3 requires M+ 264.0762; C, 68.2; H, 4.2 %).

Further elution and recrystallisation from EtOAc afforded *E* isomer **25b** as a white solid (149 mg, 17%). mp 80-81 C. Rf = 0.53 (petrol: EtOAc 3:1). H (300 MHz) 3.86 (3 H, s, OCH3), 6.81 (1 H, d, *J* = 16.2, olefinic H), 6.93 (2 H, d, *J* = 8.7, H-3’’,5’’), 6.99 (1 H, d, *J* = 16.2, olefinic H), 7.09 (2 H, dd, *J* = 8.3, 6.0, H-2’,6’), 7.45 (2 H, d, *J* = 8.7, H-2’’,6’’); C (100 MHz) 55.8 (CH3), 110.2 (dd, *J* = 15.5, 5.8, CH), 114.7 (CH), 123.9 (q, *J* = 1.9, CH), 128.4 (CH), 129.4 (CH), 130.9 (C), 134.4 (dd, *J* = 5.8, 3.9, C), 139.2 (dt, *J* = 254.0, 15.5, C), 151.8 (ddd, *J* = 254.0, 10.6, 2.9, C), 160.3 (C); *m/z* (FAB) 264 (M+, 100%). (Found: M+ 264.0769, C, 68.4; H, 4.0%. C15H11OF3 requires M+ 264.0762; C, 68.2; H, 4.2 %).

**3-Fluoro-4-methoxybenzyltriphenylphosphonium bromide** **(20)**

A solution of 3-fluoro-4-methoxybenzyl bromide (3.29 g, 15 mmol) and triphenylphosphine (3.9 g, 14.9 mmol) in toluene (50 ml) was heated under reflux for 1 h under argon. Upon cooling, the white solid formed was filtered off and recrystallisation from ethanol to afford phosphonium bromide **20** as a white crystalline solid (6.01 g, 83%). mp 245-246 °C. H (300 MHz) 3.79 (3 H, s, OCH3), 5.44 (2 H, d, *J* = 14.3, CH2), 6.65-6.73 (2 H, m, H-2,5), 7.04 (1 H, dd, *J* = 8.3, 1.9, H-6), 7.56-7.83 (15 H, m, PPh3). C (100 MHz) 30.0 (d, *J* = 47.3, CH2), 56.5 (CH3), 113.6 (CH), 117.9 (d, *J* = 85.0, C), 119.2 (dd, *J* =19.3, 4.8, CH), 119.7 (d, *J* = 7.7, C), 128.2 (dd, *J* = 5.8, 3.9, CH), 130.5 (d, *J* = 12.6, CH), 134.7 (d, *J* = 9.7, CH), 135.4 (d, *J* = 2.9, CH), 147.9 (d, *J* = 10.6, C), 151.9 (dd, *J* = 247.2, 3.9, C). *m/z* (FAB) 401 [(M-Br)+, 75%]. (Found: (M-Br)+ 401.1477; C, 65.0; H, 4.9%. C26H23OFP requires (M-Br)+ 401.1470; C, 64.9; H, 4.8%).

***Z*- and *E*-1-(3’,4',5’-Trifluorophenyl)-2-(3’’-fluoro-4'’-methoxyphenyl)ethene****(22a**, **22b)**

## Stilbenes **22a** and **22b** were prepared from 3-fluoro-4-methoxybenzyltriphenylphosphonium bromide **20** (1 g, 2.08 mmol) and 3,4,5-trifluorobenzaldehyde (**19**) (333 mg, 2.08 mmol) as in procedure A. Following flash column chromatography (petrol: EtOAc 16:1), *Z* stilbene **22a** was isolated as a colourless oil (96 mg, 15%). Rf = 0.42 (petrol: EtOAc 8:1). H (300 MHz) 3.91 (3 H, s, OCH3), 6.39 (1 H, d, *J* = 12.1, olefinic H), 6.57 (1 H, d, *J* = 12.1, olefinic H), 6.80-6.98 (5 H, m, H-2’,6’,2’’,5’’,6’’). C (100 MHz) 56.6 (CH3), 113.2 (dd, *J* = 16.4, 5.8, CH), 113.6 (d, *J* = 2.9, CH), 116.7 (d, *J* = 18.3, CH), 125.4 (d, *J* = 2.9, CH), 127.2 (q, *J* = 2.9, CH), 129.2 (d, *J* = 6.8, C), 131.3 (d, *J* = 1.9, CH), 133.4 (dd, *J* = 5.8, 3.9, C), 152.1 (dt, *J* = 252.1, 15.5, C), 147.7 (d, *J* = 10.6, C), 151.5 (ddd, *J* = 254.0, 10.6, 2.9, C), 152.4 (d, *J* = 254.0, C); *m/z* (FAB) 282 (M+, 100%). (Found: M+ 282.0664; C, 64.0; H, 3.8%. C15H10OF4 requires M+ 282.0668; C, 63.8; H, 3.6%).

Further elution and recrystallisation from EtOAc afforded *E* stilbene **22b** as a white crystalline solid (67 mg, 10%). mp 93-95 C. Rf = 0.36 (petrol: EtOAc 8:1). H (300 MHz) 3.94 (3 H, s, OCH3), 6.79 (1 H, d, *J* = 16.2, olefinic H), 6.93 (1 H, d, *J* = 16.2, olefinic H), 6.97 (1 H, t, *J* = 8.3, H-5’’), 7.09 (2 H, dd, *J* = 8.3, 6.0, H-2’,6’), 7.19 (1 H, dd, *J* = 8.3, 1.9, H-6’’), 7.28 (1 H, dd, *J* = 12.4, 1.9, H-2’’); C (100 MHz) 56.7 (CH3), 110.4 (dd, *J* = 15.5, 5.8, CH), 113.7 (d, *J* = 2.9, CH), 113.9 (d, *J* = 19.3, CH), 123.8 (d, *J* = 2.9, CH), 125.2 (q, *J* = 2.9, CH), 130.0 (d, *J* = 2.9, CH), 130.1 (d, *J* = 6.8, C), 134.0 (dd, *J* = 5.8, 3.9, C), 139.3 (dt, *J* = 254.0, 15.5, C), 148.3 (d, *J* = 10.6, C), 151.7 (ddd, *J* = 254.0, 10.6, 2.9, C), 152.9 (d, *J* = 254.0, C). *m/z* (FAB) 282 (M+, 100%). (Found: M+ 282.0666; C, 64.0; H, 3.8%. C15H10OF4 requires M+ 282.0668; C, 63.8; H, 3.6%).

***Z*- and *E*-1-(3’,4',5’-Trifluorophenyl)-2-(3’’-t-butyldimethylsilyloxy-4'’-methoxyphenyl)ethene** **(23a**, **23b)**

The stilbenes were prepared from 3*-t*-butyldimethylsilyloxy*-*4-methoxybenzyltriphenylphosphonium bromide26 (**22**) (2.22 g, 3.75 mmol) and 3,4,5-trifluorobenzaldehyde **19** (3.75 mmol) as in procedure A. Following flash column chromatography (petrol: EtOAc 16:1), *Z* stilbene **23a** was isolated as a clear oil (189 mg, 13%). Rf = 0.47 (petrol: EtOAc 19:1). H (300 MHz) 0.093 [6 H, s, (CH3)2], 0.95 [9 H, s, (CH3)3], 3.82 (3 H, s, OCH3), 6.32 (1 H, d, *J* = 12.1, olefinic H), 6.59 (1 H, d, *J* = 12.1, olefinic H), 6.69 (1 H, d, *J* = 1.9, H-2’’), 6.76 (1 H, d, *J* = 8.3, H-5’’), 6.80 (1 H, dd, *J* = 8.3, 1.9, H-6’’), 6.85 (2 H, dd, *J*= 8.3, 6.0, H-2’,6’). *m/z* (FAB) 395 [(MH+), 15 %], 73 (100%). (Found: M+ 394.1568; C, 64.0; H, 6.2%. C21H25O2F3Si requires M+ 394.1576; C, 63.9; H, 6.4%).

Further elution afforded a mixture of *Z* **23a** and *E* **23b** stilbenes (477 mg, 32 %). *E* **23b** isomer: Rf = 0.41 (petrol: EtOAc 19:1).

***Z*- and *E*-1-(3’,4',5’-Trifluorophenyl)-2-(3’’-hydroxy-4'’-methoxyphenyl)ethene** **(24a**, **24b)**

A mixture of *cis* **23a** and *trans* **23b** TBDMS ethers (430 mg, 1.09 mmol) were deprotected as in procedure B. Following flash column chromatography (petrol: EtOAc 20:1) and recrystallisation from EtOAc, *cis* isomer **24a** was isolated as a white solid (87 mg, 29%). mp 65-67 C. Rf = 0.44 (petrol: EtOAc 3:1). H (300 MHz) 3.91 (3 H, s, OCH3), 5.57 (1 H, s, OH), 6.33 (1 H, d, *J* = 12.1, olefinic H), 6.57 (1 H, d, *J* = 12.1, olefinic H), 6.73 (1 H, dd, *J* = 8.3, 1.9, H-6’’), 6.76 (1 H, d, *J* = 8.3, H-5’’), 6.79 (1 H, d, *J* = 1.9, H-2’’), 6.86 (2 H, dd, *J* = 8.3, 6.0, H-2’,6’); C (100 MHz) 56.3 (CH3), 110.9 (CH), 113.2 (dd, *J* = 15.5, 5.8, CH), 115.2 (CH), 121.3 (CH), 126.5 (q, *J* = 1.9, CH), 129.6 (C), 132.5 (CH), 133.7 (dd, *J* = 5.8, 3.9, C), 139.2 (dt, *J* = 254.0, 15.5, C), 145.9 (C), 146.6 (C), 151.5 (ddd, *J* = 254.0, 10.6, 2.9, C). *m/z* (FAB) 280 (M+, 100%). (Found: M+ 280.0714; C, 64.1; H, 3.8%. C15H11O2F3 requires M+ 280.0711; C, 64.3; H, 4.0%).

Further elution and recrystallisation from EtOAc afforded *trans* isomer **24b** as a white crystalline solid (115 mg, 38%). mp 134 - 136 C. Rf = 0.34 (petrol: EtOAc 3:1). H (300 MHz) 3.94 (3 H, s, OCH3), 5.64 (1 H, s, OH), 6.79 (1 H, d, *J* = 16.2, olefinic H), 6.87 (1 H, d, *J* = 8.3, H-5’’), 6.93 (1 H, d, *J* = 16.2, olefinic H), 6.98 (1 H, dd, *J* = 8.3, 1.9, H-6’’), 7.08 (2 H, dd, *J* = 8.3, 6.0, H-2’,6’), 7.13 (1 H, d, *J* = 1.9, H-2’’); C (100 MHz) 56.4 (CH3), 110.2 (dd, *J* = 15.5, 5.8, CH), 111.0 (CH), 112.2 (CH), 120.2 (CH), 124.4 (q, *J* = 1.9, CH), 130.3 (C), 131.0 (d, *J* = 1.9, CH), 134.3 (dd, *J* = 5.8, 3.9, C), 139.2 (dt, *J* = 254.0, 15.5, C), 146.3 (C), 147.4 (C), 151.8 (ddd, *J* = 254.0, 10.6, 2.9, C). *m/z* (FAB) 280 [(M+), 100%]. (Found: M+ 280.0707, C, 64.1; H, 3.9%. C15H11O2F3 requires M+ 280.0711; C, 64.3; H, 4.0%).

**3,4-Dimethylbenzyltriphenylphosphonium bromide****(27)**

To a solution of 3,4-dimethylbenzyl alcohol (13 g, 95.6 mmol) in dichloromethane (150 ml) at 0 C under argon, was added phosphorus tribromide (1.08 g, 3.1 ml, 31.9 mmol). After 1 hour, a further portion of phosphorus tribromide (1.08 g, 3.1 ml, 31.9 mmol) was added. Stirring was continued until TLC showed no starting material was present. The mixture was washed with saturated aqueous NaHCO3 until free from acid. The aqueous layer was separated and extracted with dichloromethane (3 x 50 ml). The combined organic layers were washed with water (2 x 50 ml), brine (50 ml), dried (MgSO4) and concentrated *in vacuo* to give 3,4-dimethylbenzyl bromide as a clear yellow oil (16.8 g, 88%). Rf = 0.61 (petrol: EtOAc 1:1). H (400 MHz) 2.30 [6 H, s, (CH3)2], 4.52 (2 H, s, CH2), 7.15 (1 H, d, *J* = 8.3, H-5), 7.18 (1 H, dd, *J* = 8.3, 1.9, H-6), 7.21 (1 H, d, *J* = 1.9, H-2). A solution of 3,4-dimethylbenzyl bromide (9.90 g, 49.7 mmol) and triphenylphosphine (13.03 g, 49.7 mmol) in toluene (150 ml) was heated under reflux for 1 h under argon. Upon cooling, the white solid formed was filtered off and recrystallised from ethanol to afford phosphonium salt **27** as a white crystalline solid (15.44 g, 62%). mp 264-266 C. H (300 MHz) 2.01 (3 H, s, CH3), 2.16 (3 H, d, *J* = 2.6, CH3), 5.23 (2 H, d, *J* = 13.9, CH2), 6.69 (1 H, t, *J* = 2.3, H-2), 6.81 (1 H, dt, *J* = 7.5, 2.3, H-6), 6.89 (1 H, d, *J* = 7.5, H-5), 7.60 – 7.83 (15 H, m, aromatic H). C (100 MHz) 19.6 (CH3), 19.7 (CH3), 30.9 (CH2), 117.9 (d, *J* = 85.0, C), 124.0 (d, *J* = 7.7, C), 128.9 (d, *J* = 4.8, CH), 130.2 (d, *J* = 2.9, CH), 130.4 (d, *J* = 12.6, CH), 132.6 (d, *J* = 4.8, CH), 134.5 (d, *J* = 8.7, CH), 135.3 (d, *J* = 2.9, CH), 136.9 (d, *J* = 3.9, C), 137.4 (d, *J* = 3.9, C). (Found C, 69.9; H, 5.6%. C17H26PBr requires C, 69.9; H, 5.7%).

***Z*- and *E*-1-(3’,4’-Dimethylphenyl)-2-(4’’-methylphenyl)ethene** **(28a**, **28b)**

Stilbenes **28a** and **28b** were prepared from 3,4-dimethylbenzyltriphenylphosphonium bromide (**27**) (1.5 g, 3.25 mmol) and 4-tolualdehyde (0.40 g, 3.33 mmol) according to procedure A. Flash column chromatography (petrol) and recrystallisation from EtOAc afforded *cis* stilbene **28a** as a white crystalline solid (92 mg, 13%). mp 42-44 C. Rf = 0.66 (petrol: EtOAc 1:1). H (300 MHz) 2.20 (3 H, s, CH3), 2.25 (3 H, s, CH3), 2.34 (3 H, s, CH3), 6.51 (2 H, s, olefinic H), 6.97-7.09 (6 H, m, H-2’,3’’,5’,5’’,6’), 7.20 (2 H, d, *J* = 8.3, H-2’’,6’’). *m/z* (EI+) 222 (M+, 100%). (Found: M+ 222.1405, C17H18 requires M+ 222.1408).

Further elution and recrystallisation from EtOAc afforded *trans* stilbene **28b** as a white crystalline solid (48 mg, 7%). mp 121-122 C. Rf = 0.61 (petrol: EtOAc 1:1) H (400 MHz) 2.30 (3 H, s, CH3), 2.33 (3 H, s, CH3), 2.39 (3 H, s, CH3), 7.03 (1 H, d, *J* = 16.6, olefinic H), 7.08 (1 H, d, *J* = 16.6, olefinic H), 7.14 (1 H, d, *J* = 8.3, H-5’), 7.19 (2 H, d, *J* = 8.3, H-3’’,5’’), 7.27 (1 H, d, *J* = 8.3, 1.9, H-6’), 7.32 (1 H, d, *J* = 1.9, H-2’), 7.43 (2 H, d, *J* = 8.3, H-2’’,6’’). *m/z* (EI+) 222 (M+, 100%). (Found: M+ 222.1412; C, 91.4; H, 8.3%. C17H18 requires M+ 222.1408; C, 91.8; H, 8.2%).

***Z*- and *E*-1-(3’,4’-Dimethylphenyl)-2-(3’’-nitro-4’’-methoxyphenyl)ethene** **(29a**, **29b)**

Stilbenes **29a** and **29b** were prepared from 3,4-dimethylbenzyltriphenylphosphonium bromide (**27**) (3 g, 6.51 mmol) and 3-nitro-4-methoxybenzaldehyde (1.18 g, 6.51 mmol) as in procedure A. Following flash column chromatography (petrol: EtOAc 15:1) and recrystallisation from EtOAc, *cis* stilbene **29a** was isolated as a bright yellow crystalline solid (320 mg, 17%). mp 98-100 C. Rf = 0.21 (petrol: EtOAc 1:1). H (300 MHz) 2.21 (3 H, s, CH3), 2.25 (3 H, s, CH3), 3.94 (3 H, s, OCH3), 6.43 (1 H, d, *J* = 12.1, olefinic H), 6.62 (1 H, d, *J* = 12.1, olefinic H), 6.92 (1 H, d, *J* = 8.7, H-5’’), 6.97 (1 H, dd, *J* = 7.9, 1.1, H-6’), 7.02 (1 H, d, *J* = 7.9, H-5’), 7.04 (1 H, d, *J* = 1.1, H-2’), 7.43 (1 H, dd, *J* = 8.7, 2.3, H-6’’), 7.77 (1 H, d, *J* = 2.3, H-2’’). C (100 MHz) 20.1 (CH3), 20.1 (CH3), 56.9 (CH3), 113.5 (CH), 126.3 (CH), 126.4 (CH), 126.7 (CH), 130.1 (CH), 130.2 (CH), 130.5 (C), 132.0 (CH), 134.3 (C), 134.9 (CH), 136.4 (C), 137.1 (C), 139.8 (C), 152.0 (C). max (MeOH) = 296 ( = 12,400). *m/z* (EI+) 284 (M+, 25%), 135 (100%). (Found: M+ 283.1205; C, 72.1; H, 6.2; N, 4.95%. C17H17O3N requires M+ 283.1208; C, 72.1; H, 6.05; N, 4.9%).

Further elution and recrystallisation from EtOAc afforded *trans* stilbene **29b** as a bright yellow crystalline solid (400 mg, 22%). mp 129-130 C; Rf = 0.16 (petrol: EtOAc 1:1). H (300 MHz) 2.30 (3 H, s, CH3), 2.31 (3 H, s, CH3), 3.99 (3 H, s, OCH3), 6.96 (1 H, d, *J* = 16.6, olefinic H), 7.03 (1 H, d, *J* = 16.6, olefinic H), 7.09 (1 H, d, *J* = 8.7, H-5’’), 7.14 (1 H, d, *J* = 7.5, H-5’), 7.26 (1 H, dd, *J* = 7.5, 1.5, H-6’), 7.30 (1 H, d, *J* = 1.5, H-2’), 7.65 (1 H, dd, *J* = 8.7, 2.3, H-6’’), 8.00 (1 H, d, *J* = 2.3, H-2’’). c (100 MHz) 20.0 (CH3), 20.3 (CH3), 57.0 (CH3), 114.1 (CH), 123.4 (CH), 124.5 (CH), 124.9 (CH), 128.2 (CH), 130.0 (CH), 130.5 (CH), 131.0 (C), 132.2 (CH), 134.7 (C), 137.2 (C), 137.3 (C), 140.1 (C), 152.3 (C); *m/z* (EI+) 285 [(MH)+, 20%], 223 (100%). (Found: M+ 283.1209; C, 72.0; H, 6.2; N, 5.0%. C17H17O3N requires M+ 283.1208; C, 72.1; H, 6.05; N, 4.9%). max (MeOH) = 314 ( = 35,925).

***Z*- and *E*-1-(3’,4’-Dimethylphenyl)-2-(4’’-methoxyphenyl)ethene (30a,** **30b)**

Stilbenes **30a** and **30b** were prepared from 3,4-dimethylbenzyltriphenylphosphonium bromide **27** (2 g, 4.34 mmol) and 4-anisaldehyde (0.59 g, 4.34 mmol) as in procedure A. Following flash column chromatography (petrol: EtOAc 19:1) *cis* stilbene **30a** was isolated as a colourless oil (194 mg, 16%). Rf = 0.47 (petrol: EtOAc 1:1). H (300 MHz) 2.25 (3 H, s, CH3), 2.30 (3 H, s, CH3), 3.86 (3 H, s, OCH3), 6.49 (1 H, d, *J* = 12.5, olefinic H), 6.52 (1 H, d, *J* = 12.5, olefinic H), 6.78 (2 H, d, *J* = 8.7, H-3’’,5’’), 7.00 (1 H, d, *J* = 7.9, H-5’), 7.04 (1 H, dd, *J* = 7.9, 1.9, H-6’), 7.08 (1 H, d, *J* = 1.9, H-2’), 7.23 (2 H, d, *J* = 8.7, H-2’’,6’’). C (100 MHz) 19.9 (CH3), 20.1 (CH3), 55.5 (CH3), 114.1 (CH), 126.5 (CH), 129.2 (CH), 129.3 (CH), 129.9 (CH), 130.4 (CH), 130.5 (CH), 130.6 (C), 135.4 (C), 135.7 (C), 136.7 (C), 159.0 (C). *m/z* (EI+) 239 [(MH)+, 100%]. (Found: M+ 238.1353; C, 85.5; H, 7.4%. C17H18O requires M+ 238.1358; C 85.7, H 7.6%).

Further elution and recrystallisation from EtOAc afforded *trans* stilbene **30b** as a white powder (148 mg, 12%). mp 122-123 C. Rf = 0.41 (petrol: EtOAc 1:1). H (400 MHz) 2.30 (3 H, s, CH3), 2.32 (3 H, s, CH3), 3.87 (3 H, s, OCH3), 6.93 (2 H, d, *J* = 8.3, H-3’’,5’’), 6.96 (1 H, d, *J* = 16.1, olefinic H), 7.05 (1 H, d, *J* = 16.1, olefinic H), 7.14 (1 H, d, *J* = 8.3, H-5’), 7.26 (1 H, dd, *J* = 8.3, 1.9, H-6’), 7.31 (1 H, d, *J* = 1.9, H-2’), 7.85 (2 H, d, *J* = 8.3, H-2’’,6’’); C (100 MHz) 19.9 (CH3), 20.3 (CH3), 55.7 (CH3), 114.5 (CH), 124.1 (CH), 127.1 (CH), 127.5 (CH), 127.9 (CH), 128.0 (CH), 130.3 (CH), 130.8 (C), 135.7 (C), 136.2 (C), 137.1 (C), 159.5 (C). *m/z* (EI+) 239 [(MH)+, 100%]. (Found: M+ 238.1353. C17H18O requires M+ 238.1358).

***Z*- and *E*-1-(3’,4’-Dimethylphenyl)-2-(3’’-bromo-4’’-methoxyphenyl)ethene (31a,** **31b)**

Stilbenes **31a** and **31b** were prepared from 3,4-dimethylbenzyltriphenylphosphonium bromide **27** (2.94 g, 6.38 mmol) and 3-bromo-4-methoxybenzaldehyde (1.37 g, 6.37 mmol) as in procedure A. Following flash column chromatography (petrol: EtOAc 19:1), *cis* stilbene **31a** was isolated as a colourless oil (500 mg, 23%). Rf = 0.63 (petrol: EtOAc 1:1). H (300 MHz) 2.23 (3 H, s, CH3), 2.26 (3 H, s, CH3), 3.90 (3 H, s, OCH3), 6.40 (1 H, d, *J* = 12.4, olefinic H), 6.51 (1 H, d, *J* = 12.4, olefinic H), 6.76 (1 H, d, *J* = 8.3, H-5’’), 7.01 (2 H, d, *J* = 1.5, H-2’,6’), 7.07 (1 H, s, H-5’), 7.21 (1 H, dd, *J* = 8.3, 1.5, H-6’’), 7.52 (1 H, d, *J* = 1.5, H-2’’). C (100 MHz) 20.0 (CH3), 20.2 (CH3), 56.6 (CH3), 111.6 (CH), 111.9 (C), 126.6 (CH), 127.9 (CH), 129.5 (CH), 130.0 (CH), 130.5 (CH), 130.6 (CH), 131.9 (CH), 134.1 (C), 134.9 (C), 136.2 (C), 136.9 (C), 155.2 (C). *m/z* (EI+) 318 (M+, 95%), 316 (M+, 100%). (Found: M+ 316.0467; C, 64.4; H, 5.3%. C17H17O79Br requires M+ 316.0463; C 64.4, H 5.4%).

Further elution and recrystallisation from EtOAc afforded *trans* stilbene **31b** as a cream powder (148 mg, 12%). mp 103-105C. Rf = 0.58 (petrol: EtOAc 1:1). H (400 MHz) 2.30 (3 H, s, CH3), 2.33 (3 H, s, CH3), 3.95 (3 H, s, OCH3), 6.91 (1 H, d, *J* = 8.3, H-5’’), 6.96 (2 H, s, olefinic H), 7.14 (1 H, d, *J* = 8.3, H-5’), 7.26 (1 H, dd, *J* = 8.3, 1.9, H-6’), 7.31 (1 H, d, *J* = 1.9, H-2’), 7.41 (1 H, dd, *J* = 8.3, 1.9, H-6’’), 7.85 (2 H, d, *J* = 1.9, H-2’’). C (100 MHz) 20.0 (CH3), 20.3 (CH3), 56.7 (CH3), 112.3 (CH), 112.4 (C), 124.3 (CH), 126.0 (CH), 127.1 (CH), 128.1 (CH), 128.4 (CH), 130.4 (CH), 131.3 (CH), 132.3 (C), 135.2 (C), 136.7 (C), 137.2 (C), 155.5 (C). *m/z* (EI+) 318 (M+, 81Br, 95%), 316 (M+, 79Br, 100%). (Found: M+ 316.0464; C, 64.3; H, 5.6%. C17H17O79Br requires 316.0463; C 64.4, H 5.4%).

***Z*- and *E*-1-(3’,4’-Dimethylphenyl)-2-(3’’-fluoro-4’’-methoxyphenyl)ethene** **(32a**, **32b)**

Stilbenes **32a** and **32b** were prepared from 3,4-dimethylbenzyltriphenylphosphonium bromide (**27**) (2 g, 4.34 mmol) and 3-fluoro-4-methoxybenzaldehyde (0.67 g, 4.34 mmol) as in procedure A. Following flash column chromatography (petrol: EtOAc 30:1), *cis* stilbene **32a** was isolated as a colourless oil (483 mg, 44%). Rf = 0.38 (petrol:EtOAc 15:1). H (400 MHz) 2.21 (3 H, s, CH3), 2.26 (3 H, s, CH3), 3.90 (3 H, s, OCH3), 6.42 (1 H, d, *J* = 12.1, olefinic H), 6.52 (1 H, d, *J* = 12.1, olefinic H), 6.83 (1 H, t, *J* = 8.3, H-5’’), 6.97-7.06 (5 H, m, H-2’,2’’,5’,6’,6’’). C (100 MHz) 20.0 (CH3), 20.1 (CH3), 56.6 (CH3), 113.3 (d, *J* = 1.9, CH), 116.8 (d, *J* = 18.3, CH), 125.5 (d, *J* = 2.9, CH), 126.5 (CH), 128.3 (d, *J* = 1.9, CH), 130.0 (CH), 130.4 (CH), 130.5 (CH), 131.1 (d, *J* = 6.8, C), 135.0 (C), 136.1 (C), 136.9 (d, *J* = 6.8, C), 147.0 (d, *J* = 10.6, C), 152.3 (d, *J* = 245.3, C). *m/z* (EI+) 256 (M+, 100%). (Found: M+ 256.1262; C, 79.8; H, 6.8%. C17H17OF requires M+ 256.1263; C, 79.7; H, 6.7%).

Further elution and recrystallisation from EtOAc afforded *trans* stilbene **32b** as a white solid (182 mg, 16%). mp 135-136 C. Rf = 0.31 (petrol:EtOAc 15:1). H (400 MHz) 2.29 (3 H, s, CH3), 2.31 (3 H, s, CH3), 3.95 (3 H, s, OCH3), 6.92 (1 H, d, *J* = 16.6, olefinic H), 6.95 (1 H, t, *J* = 8.3, H-5’’), 6.99 (1 H, d, *J* = 16.6, olefinic H), 7.13 (1 H, d, *J* = 7.9, H-5’), 7.19 (1 H, dd, *J* = 8.3, 1.9, H-6’’), 7.25 (1 H, dd, *J* = 8.3, 1.5, H-6’), 7.29 (1 H, dd, *J* = 12.0, 1.9, H-2’’), 7.29 (1 H, d, *J* = 1.5, H-2’); C (100 MHz) 20.0 (CH3), 20.3 (CH3), 56.7 (CH3), 113.6 (d, *J* = 18.3, CH), 113.7 (d, *J* = 1.9, CH), 123.1 (d, *J* = 3.9, CH), 124.3 (CH), 126.5 (d, *J* = 1.9, CH), 128.1 (CH), 128.4 (CH), 130.4 (CH), 131.7 (d, *J* = 5.8, C), 135.2 (C), 136.7 (C), 137.2 (C), 147.4 (d, *J* = 11.6, C), 153.0 (d, *J* = 245.3, C). *m/z* (EI+) 256 (M+, 100%). (Found: M+ 256.1260; C, 79.5; H, 6.9%. C17H17OF requires M+ 256.1263; C, 79.7; H, 6.7%).

***Z*- and *E*-1-(3’,4’-Dimethylphenyl)-2-(3’’-fluoro-4’’-methylphenyl)ethene** **(33a**, **33b)**

Stilbenes **33a** and **33b** were prepared from 3,4-dimethylbenzyltriphenylphosphonium bromide **27** (2 g, 4.34 mmol) and 3-fluoro-4-tolualdehyde (0.60 g, 4.35 mmol) as in procedure A. Following flash column chromatography (petrol), *cis* stilbene **33a** was isolated as a colourless oil (401 mg, 39%). Rf = 0.59 (petrol). H (400 MHz) 2.21 (3 H, s, CH3), 2.26 (3 H, s, CH3), 2.27 (3 H, s, CH3), 6.45 (1 H, d, *J* = 12.1, olefinic H), 6.55 (1 H, d, *J* = 12.1, olefinic H), 6.92-6.96 (2 H, m, H-aromatic), 6.99-7.14 (4 H, m, H-aromatic) C (100 MHz) 14.8 (d, *J* = 2.9, CH3), 20.0 (CH3), 20.1 (CH3), 115.6 (d, *J* = 23.2, CH), 123.9 (d, *J* = 17.4, C), 124.9 (d, *J* = 2.9, CH), 126.6 (CH), 128.6 (d, *J* = 1.9, CH), 130.0 (CH), 130.6 (CH), 131.2 (CH), 131.5 (d, *J* = 4.8, CH), 134.1 (C), 136.2 (C), 136.9 (C), 137.5 (d, *J* = 7.7, C), 161.6 (d, *J* = 244.3, C). *m/z* (EI+) 240 (M+, 100%). (Found: M+ 240.1316; C, 85.2; H, 7.0%. C17H17F requires M+ 240.1314; C, 85.0; H, 7.1%).

Further elution and recrystallisation from EtOAc afforded *trans* stilbene **33b** as a white solid (250 mg, 24%). mp 120-121 C. Rf = 0.52 (petrol). H (400 MHz) 2.29 (3 H, s, CH3), 2.30 (3 H, s, CH3), 2.31 (3 H, s, CH3), 6.98 (1 H, d, *J* = 16.6, olefinic H), 7.05 (1 H, d, *J* = 16.6, olefinic H), 7.12-7.20 (4 H, m, H-2’’,5’,5’’,6’), 7.26 (1 H, dd, *J* = 7.9, 2.3, H-6’), 7.31 (1 H, d, *J* = 2.3, H-2’). C (100 MHz) 14.9 (d, *J* = 2.9, CH3), 20.1 (CH3), 20.3 (CH3), 112.7 (d, *J* = 23.2, CH), 122.5 (d, *J* = 2.9, CH), 124.2 (d, *J* = 18.3, C), 124.5 (CH), 126.8 (d, *J* = 2.9, CH), 128.2 (CH), 129.4 (CH), 130.4 (CH), 131.9 (d, *J* = 5.8, CH), 135.1 (C), 136.9 (C), 137.2 (C), 137.9 (d, *J* = 7.7, C), 162.0 (d, *J* = 244.3, C). *m/z* (EI+) 240 (M+, 100%). (Found: M+ 240.1312; C, 84.9; H, 7.4%. C17H17F requires 240.1314; C, 85.0; H, 7.1%).

***Z*- and *E*-1-(3’,4’-Dimethylphenyl)-2-(3’’-nitro-4’’-methylphenyl)ethene** **(34a**, **34b)**

Stilbenes **34a** and **34b** were prepared from 3,4-dimethylbenzyltriphenylphosphonium bromide (**27**) (2 g, 4.34 mmol) and 3-nitro-4-tolualdehyde (0.72 g, 4.36 mmol) as in procedure A. Following flash column chromatography (petrol: EtOAc 19:1), *cis* stilbene **34a** was isolated as a clear yellow oil (157 mg, 14%). Rf = 0.38 (petrol: EtOAc 9:1). H (300 MHz) 2.20 (3 H, s, CH3), 2.26 (3 H, s, CH3), 2.57 (3 H, s, CH3), 6.49 (1 H, d, *J* = 12.4, olefinic H), 6.67 (1 H, d, *J* = 12.4, olefinic H), 6.96 (1 H, dd, *J* = 8.3, 1.9, H-6’), 7.02 (1 H, d, *J* = 8.3, H-5’), 7.03 (1 H, d, *J* = 1.9, H-2’), 7.16 (1 H, d, *J* = 8.3, H-5’’), 7.39 (1 H, dd, *J* = 8.3, 1.9, H-6’’), 7.89 (1 H, d, *J* = 1.9, H-2’’). C (100 MHz) 20.0 (CH3), 20.1 (CH3), 20.6 (CH3), 125.3 (CH), 126.4 (CH), 127.0 (CH), 130.1 (CH), 130.4 (CH), 130.8 (CH), 132.3 (C), 132.8 (CH), 132.9 (CH), 133.6 (C), 134.2 (C), 136.7 (C), 137.1 (C), 149.6 (C). *m/z* (EI+) 267 (M+, 100%). (Found: M+ 267.1257; C17H17NO2 requires M+ 267.1259).

Further elution and recrystallisation from EtOAc afforded *trans* stilbene **34b** as a bright yellow crystalline solid (110 mg, 9%). mp 120-122 C. Rf = 0.30 (petrol: EtOAc 9:1). H (300 MHz) 2.30 (3 H, s, CH3), 2.31 (3 H, s, CH3), 2.62 (3 H, s, CH3), 7.04 (1 H, d, *J* = 16.2, olefinic H), 7.15 (1 H, d, *J* = 16.2, olefinic H), 7.16 (1 H, d, *J* = 8.3, H-5’), 7.28 (1 H, dd, *J* = 8.3, 1.9, H-6’), 7.32 (1 H, d, *J* = 8.3, H-5’’), 7.33 (1 H, d, *J* = 1.9, H-2’), 7.62 (1 H, dd, *J* = 8.3, 1.9, H-6’’), 8.11 (1 H, d, *J* = 1.9, H-2’’). C (100 MHz) 20.1 (CH3), 20.2 (CH3), 20.7 (CH3), 122.5 (CH), 124.7 (CH), 125.2 (CH), 128.3 (CH), 130.5 (CH), 130.8 (CH), 131.2 (CH), 132.4 (C), 133.4 (C), 134.5 (C), 137.3 (C), 137.4 (C), 137.5 (C), 149.9 (C). *m/z* (EI+) 267 (M+, 100%). (Found: M+ 267.1255; C, 76.5; H, 6.5; N, 5.1%. C17H17NO2 requires M+ 267.1259; C, 76.4; H, 6.4; N, 5.2%).

***Z*- and *E*-1-(3’,4’-Dimethylphenyl)-2-(3’’-t-butyldimethylsilyloxy-4’’-methoxyphenyl)ethene** **(35a**, **35b)**

Stilbenes **35a** and **35b** were prepared from 3,4-dimethylbenzyltriphenylphosphonium bromide **27** (3 g, 6.51 mmol) and 3-*t*-butyldimethylsilyloxy-4-methoxybenzaldehyde **21** (1.73 g, 6.51 mmol) as in procedure A. Following flash column chromatography (petrol: EtOAc 19:1), *cis* stilbene **35a** was isolated as a colourless oil (360 mg, 15%). Rf = 0.58 (petrol:EtOAc 9:1). H (400 MHz) 0.06 [6 H, s, Si(CH3)2], 0.95 [9 H, s, (CH3)3], 2.20 (3 H, s, CH3), 2.26 (3 H, s, CH3­), 3.80 (3 H, s, OCH3), 6.45 (1 H, d, *J* = 12.1, olefinic H), 6.50 (1 H, d, *J* = 12.1, olefinic H), 6.74 (1 H, d, *J* = 8.3, H-5’’), 6.82 (1 H, dd, *J* = 8.3, 1.9, H-6’), 6.91 (1 H, d, *J* = 1.9, H-2’), 7.01 (1 H, d, *J* = 8.3, H-5’), 7.05 (1 H, dd, *J* = 8.3, 1.9, H-6’’), 7.09 (1 H, d, *J* = 1.9, H-2’’).

*Trans* isomer **35b** could not be obtained pure. Rf = 0.49 (petrol:EtOAc 9:1).

# *Z*-1-(3’,4’-Dimethylphenyl)-2-(3’’-hydroxy-4’’-methoxyphenyl)ethene (36a)

Following procedure B a stirred solution of TBDMS ether **145** (360 mg, 0.978 mmol) in dry THF (20 ml) was added tetra-*n*-butylammonium fluoride (3 ml of 1 M solution, 3 mmol). Flash column chromatography (petrol: EtOAc 4:1) afforded deprotected phenol **36a** as a clear yellow oil (120 mg, 48%). Rf = 0.58 (petrol: EtOAc 4:1). H (300 MHz) 2.22 (3 H, s, CH3), 2.26 (3 H, s, CH3), 3.90 (3 H, s, OCH3), 5.50 (1 H, s, OH), 6.45 (1 H, d, *J* = 12.1, olefinic H), 6.50 (1 H, d, *J* = 12.1, olefinic H), 6.74 (1 H, d, *J* = 8.3, H-5’’), 6.82 (1 H, dd, *J* = 8.3, 1.9, H-6’), 6.91 (1 H, d, *J* = 1.9, H-2’’), 7.01 (1 H, d, *J* = 8.3, H-5’), 7.05 (1 H, dd, *J* = 8.3, 1.9, H-6’’), 7.09 (1 H, d, *J* = 1.9, H-2’). *m/z* (EI+) 255 [(MH)+, 100%]. (Found: M+ 254.1303; C17H18O2 requires 254.1307).

***Z*- and *E*-1-(Phenyl)-2-(4’-methoxyphenyl)ethene** **(38a**, **38b)**

Stilbenes **38a** and **38b** were prepared from benzyltriphenylphosphonium bromide (**37**)(2 g, 5.1 mmol) and 4-anisaldehyde (0.70 g, 0.63 ml, 5.1 mmol) according to procedure A. Flash column chromatography (EtOAc: petrol 1:40) gave the *cis* isomer27 **38a** as an oil (0.1 g, 9.3%). δH (300 MHz) 3.78 (3H, s, OMe), 6.53 (1 H, d, *J* = 12.1, olefinic H), 6.58 (1 H, d, *J* = 12.1, olefinic H), 6.80 (2 H, d, *J* = 9.0, H3”,5”), 7.15 – 7.30 (7 H, m, H-2’,3’,4’,5’,6’,2”,6”). *m/z* FAB 210 ([M+] 100%). (Found: M+ 210.1044; C, 85.7; H, 6.7%. C15H14O requires M+ 210.1045; C, 85.9; H, 6.9%).

Further elution afforded the *trans* isomer **38b** as white crystals (0.08 g, 7.4%). mp 130-132 oC (lit.28 mp 135 oC.) δH (300 MHz) 3.83 (3 H, s, OMe), 6.96 (2 H, d, *J* = 8.7, H3”,5”), 7.10 (1 H, d, *J* = 16.5, olefinic H), 7.20 (1 H, d, *J* = 16.5, olefinic H), 7.43 – 7.50 (7 H, m, H-2’,3’,4’,5’,6’,2”,6”). *m/z* FAB 210 ([M+] 90%), 154 100%. (Found: M+ 210.1044; C, 85.9; H, 6.9%. C15H14O requires M+ 210.1045; C, 85.7; H, 6.7%).

***Z*- and *E*-1-(Phenyl)-2-(3’-*t*-butyldimethylsilyloxy-4’-methoxyphenyl)ethene** **(40a**, **40b)**

Stilbenes **40a** and **40b** were prepared from benzyltriphenylphosphonium bromide (**37**) (2 g, 5.1 mmol) and aldehyde **21** (1.35 g, 5.1 mmol) according to procedure A. Flash column chromatography (EtOAc: petrol 1:40) afforded the *cis* isomer **40a** as an oil (0.20 g, 10.5%). δH (400 MHz) 0.76 (6 H, s, Si(CH3)2), 3.81 (3 H, s, OCH3), 6.504 (1 H, d, *J =* 12.5, olefinic H), 6.527 (1 H, d, *J =* 12.5, olefinic H), 6.73 (1 H, d, *J =* 8.5, 2”H), 6.77 (1 H, d, *J =* 2.0, 6”H), 6.83 (1 H, dd, *J =* 2.0, 8.5, 5”H), ”), 7.20 – 7.30 (7 H, m, H-2’,3’,4’,5’,6’,). *m/z* FAB 340 ([M+] 65%), 283 (80%). (Found: M+ 340.1858. C21H28O2Si requires M+ 340.1858).

Further elution afforded the *trans* compound **40b** as white crystals (0.11 g, 10.5%). δH (300 MHz, acetone-d6) 0.76 (6 H, s, Si(CH3)2), 3.81 (3 H, s, OCH3), 6.98 (1 H, dd, *J =* 2.0, 8.5, 5”H), 7.05 – 7.60 (11 H, m olefinic Hs, H-2’,3’,4’,5’,6’,2”,6”). (Found: M+ 340.1858. C21H28O2Si requires M+ 340.1858).

***Z*- and *E*-1-(Phenyl)-2-(3’-fluoro-4’-methoxyphenyl)ethene** **(39a**, **39b)**

Stilbenes **39a** and **39b** were prepared from benzyltriphenylphosphonium bromide (**37**)(2 g, 5.1 mmol) and 3-fluoro-4-methoxybenzaldehyde (0.78g, 5.1 mmol) according to procedure A. Flash column chromatography (EtOAc: petrol 1:40) afforded the *cis* isomer **39a** as an oil (0.25 g, 22%). δH (300 MHz) 3.81 (3 H, s, OCH3), 6.51 (1 H, d, *J =* 12.4, olefinic H), 6.58 (1 H, d, *J =* 12.4, olefinic H), 6.84 (1 H, d, *J =* 8.3, 2”H), 6.99 (1 H, dd, *J =* 8.3, 1.9, 5”H), 7.01 (1 H, d, *J =* 1.9, 6”H), 7.25 (2 H, s, 2’,6’ H). *m/z* FAB 228 ([M+], 100%). (Found: M+ 229.1028; C, 79.0; H, 5.7; F, 8.6%. C15H14OF requires M+ + H 229.1029; C, 78.9; H, 5.7; F, 8.3%).

Further elution afforded the *trans* isomer **39b** as colourless crystals (0.20 g, 18%); mp = 117-119 oC. δH (300 MHz) 3.93 (3 H, s, OMe), 6.95 (1 H, d, *J* = 16.6, olefinic H), 7.03 (1 H, d, *J* = 16.6, olefinic H), 7.08 – 7.22 (5 H, m, aromatic H), 7.31 (1 H, dd, *J* = 12.4, 1.8, H2”), 7.37 (1 H, t, *J* = 8.7, H5”), 7.51 (1 H, dd, *J =* 8.7, 1.6, H6”). *m/z* FAB 228 ([M+] 100%). (Found: M+ 229.1028; C, 79.0; H, 5.7; F, 8.6%. C15H13OF requires M+ + H 229.1029; C, 78.9; H, 5.7; F, 8.3%).

***Z*-1-(Phenyl)-2-(3’-hydroxy- 4’-methoxyphenyl)ethene** **(41a)**

*Z*-1-Phenyl-2-(3-*t*-butyldimethylsiloxy-4-methoxy)ethene (**40a**) (0.1 g, 0.29 mmol) was reacted as in procedure B to yield stilbene **41a** as a colourless oil29 (0.04 g, 60%). H (300 MHz) 3.81 (3 H, s, OCH3), 6.50 (1 H, d, *J =* 12.5, olefinic H), 6.53 (1 H, d, *J =* 12.5, olefinic H), 6.73 (1 H, d, *J =* 8.5, 2”H), 6.77 (1 H, d, *J =* 2.0, 6”H), 6.83 (1 H, dd, *J =* 2.0, 8.5, 5”H), 7.18 – 7.25 (7 H, m, H-2’,3’,4’,5’,6’).

***E*-1-(Phenyl)-2-(3’-hydroxy- 4’-methoxyphenyl)ethene** **(41b)**

This stilbene **41b** was prepared as for the above *Z*-compound **41a** starting from silyl ether **40b** (0.1 g, 0.29 mmol) as a white crystals (0.03 g 45%). mp 155 – 157 (lit.30 mp 159 oC. H (300 MHz) 3.81 (3 H, s, OCH3), 6.98 (1 H, dd, *J =* 2.0, 8.5, 5”H), 7.07 (1 H, d, *J =* 16.6, olefinic H), 7.16 (1 H, d, *J =* 16.6, olefinic H), 7.34 (1 H, d, *J =* 8.5, 2”H), 7.38 (1 H, d, *J =* 2.0, 6”H), 7.22 (7 H, m, H-2’, 3’,4’,5’,6’).

***E*-2-(3’,4’,5’-Trimethylphenyl)-3-(4’’-methoxyphenyl)prop-2-enoic acid** **(43)**

Cinnamic acid **43** was prepared from 4-anisaldehyde (1.91 g, 14 mmol) and 3,4,5-trimethylphenylacetic acid **42** (5 g, 28 mmol) as in procedure C. Recrystallisation from ethanol afforded cinnamic acid **43** as yellow crystals (1.36 g, 57 %). mp 225 – 226 °C. H (300 MHz, d6-DMSO) 2.16 (3 H, s, CH3), 2.22 [6 H, s, (CH3)2], 3.70 (3 H, s, OCH3), 6.77 (2 H, d, *J* = 9.0, H-3’’,5’’), 6.79 (2 H, s, H-2’,6’), 7.06 (2 H, d, *J* = 9.0, H-2’’,6’’), 7.66 (1 H, s, olefinic H), 12.37 (1 H, s, OH). C (100 MHz, d6-DMSO) 15.3 (CH3), 20.4 (CH3), 55.5 (CH3), 114.1 (CH), 127.4 (C), 128.5 (CH), 131.1 (C), 132.3 (CH), 133.9 (C), 134.1 (C), 136.5 (C), 138.5 (CH), 160.2 (C), 169.2 (C). max (MeOH) 297 ( = 17,900); *m/z* (FAB) 296 (M+, 100%). (Found: M+ 296.1419; C, 76.9; H, 6.8%. C19H20O3 requires M+ 296.1412; C, 77.0; H, 6.8 %).

***Z*- and *E*-1-(3’,4’,5’-Trimethylphenyl)-2-(4’’-methoxyphenyl)ethene (50a**, **50b)**

*Cis* stilbene **50a** was prepared from cinnamic acid **42** (1 g, 3.38 mmol) as in procedure C. Flash column chromatography (petrol:EtOAc 40:1) afforded *cis* isomer **50a** as a clear oil (686 mg, 81%). Rf = 0.44 (petrol:EtOAc 19:1). H (300 MHz) 2.17 (3 H, s, CH3), 2.21 [6 H, s, (CH3)2], 3.82 (3 H, s, OCH3), 6.43 (1 H, d, *J* = 12.4, olefinic H), 6.47 (1 H, d, *J* = 12.4, olefinic H), 6.78 (2 H, d, *J* = 8.7, H-3’’,5’’), 6.96 (2 H, s, H-2’,6’), 7.25 (2 H, d, *J* = 8.7, H-2’’,6’’);C (100 MHz) 15.7 (CH3), 21.0 (CH3), 55.6 (CH3), 113.9 (CH), 128.4 (CH), 129.2 (CH), 129.3 (CH), 130.51 (C), 130.6 (CH), 134.38 (C), 134.9 (C), 136.7 (C), 159.07 (C); *m/z* (FAB) 252 (M+, 100%). (Found: (MH)+ 253.1596; C, 85.5; H, 8.2%. C18H20O requires (MH)+ 253.1592; C, 85.7; H, 8.0%).

Further elution and recrystallisation from EtOAc afforded *trans* isomer **50b** as a white solid (58 mg, 7%). mp 74-75 C. Rf = 0.34 (petrol:EtOAc 19:1). H (300 MHz) 2.20 (3 H, s, CH3), 2.33 [6 H, s, CH3)2], 3.85 (3 H, s, OCH3), 6.91 (2 H, d, *J* = 8.7, H-3’’,5’’), 6.92 (1 H, d, *J* = 16.2, olefinic H), 7.04 (1 H, d, *J* = 16.2, olefinic H), 7.18 (2 H, s, H-2’,6’), 7.46 (2 H, d, *J* = 8.7, H-2’’,6’’). *m/z* (FAB) 252 (M+, 100%). (Found: (MH)+ 253.1585; C, 85.6; H, 8.1%. C18H20O requires (MH)+ 253.1592; C, 85.7; H, 8.0%).

***E*-2-(3’,4’,5’-Trimethylphenyl)-3-(3’’-fluoro-4’’-methoxyphenyl)prop-2-enoic acid** **(44)**

Cinnamic acid **44** was prepared from 3-fluoro-4-methoxybenzaldehyde (500 mg, 3.24 mmol) and 3,4,5-trimethylphenylacetic acid (**42**) (1.15 g, 6.46 mmol) as in procedure C. Recrystallisation from ethanol afforded cinnamic acid **44** as yellow needles (571 mg, 28%). mp 211-213 °C. H (300 MHz, DMSO) 2.16 (3 H, s, CH3), 2.22 [6 H, s, (CH3)2], 3.78 (3 H, s, OCH3), 6.78 (2 H, s, H-2’,6’), 6.94-7.07 (3 H, m, H-2’’,5’’,6’’), 7.61 (1 H, s, olefinic H), 12.51 (1 H, s, OH). C (100 MHz, DMSO) 15.4 (CH3), 20.5 (CH3), 56.3 (CH3), 113.8 (d, *J* = 2.9, CH), 117.3 (d, *J* = 19.3, CH), 127.9 (d, *J* = 6.8, C), 128.0 (d, *J* = 2.9, CH), 138.3 (CH), 132.5 (C), 133.4 (C), 134.4 (C), 136.6 (C), 137.4 (d, *J* = 1.9, CH), 148.1 (d, *J* = 10.6, C), 151.4 (d, *J* = 243.4, C), 169.0 (C). *m/z* (FAB) 314 (M+, 100%). (Found: (MH)+ 315.1401; C, 72.4; H, 5.9%. C19H19O3F requires (MH)+ 315.1396; C, 72.6; H, 6.1%).

# *Z*-1-(3’,4’,5’-Trimethylphenyl)-2-(3’’-fluoro-4’’-methoxyphenyl)ethene (51a)

*Cis* stilbene **51a** was prepared from cinnamic acid **44** (500 mg, 1.59 mmol) as in procedure D. Flash column chromatography (petrol:EtOAc 19:1) and recrystallisation from EtOAc afforded *cis* isomer **51a** as an off white solid (166 mg, 39%). mp 48-50 C. Rf = 0.45 (petrol:EtOAc 9:1). H (300 MHz) 2.17 (3 H, s, CH3), 2.22 [6 H, s, (CH3)2],3.90 (3 H, s, OCH3), 6.39 (1 H, d, *J* = 12.0, olefinic H), 6.49 (1 H, d, *J* = 12.0, olefinic H), 6.83 (1 H, t, *J* = 8.3, H-5’’), 6.93 (2 H, s, H-2’,6’), 6.99-7.08 (2 H, m, H-2’’,6’’). C (100 MHz) 15.8 (CH3), 20.9 (CH3), 56.7 (CH3), 113.2 (d, *J* = 1.9, CH), 116.7 (d, *J* = 19.3, CH), 125.5 (d, *J* = 2.9, CH), 128.1 (d, *J* = 1.9, CH), 128.2 (CH), 130.5 (CH), 131.1 (d, *J* = 6.8, C), 134.2 (C), 134.7 (C), 136.7 (C), 146.9 (d, *J* = 10.6, C), 152.3 (d, *J* = 245.3, C). *m/z* (FAB) 270 (M+, 100%). (Found: (MH)+ 271.1501; C, 80.2; H, 7.2%. C18H19OF requires (MH)+ 271.1498; C, 80.0; H, 7.1 %).

**4-Methoxy-3-(2’,3’,5’,6’-tetrafluoro-4’-trifluoromethylphenoxy)-benzaldehyde (48)**

A mixture of 3-hydroxy-4-methoxybenzaldehyde (20 g, 0.132 mol), octafluorotoluene (29.6 ml, 0.209 mol), tetra-*n*-butylammonium hydrogen sulphate (20 g, 58.9 mmol), dichloromethane (160 ml) and aqueous 1 M sodium hydroxide (240 ml) was stirred at room temperature for 45 min. The organic phase was separated and the aqueous layer was extracted with dichloromethane (3 x 50 ml). The organic layers were combined and washed with water (2 x 50 ml), brine (50ml), dried (MgSO4) and concentrated *in vacuo*. Recrystallisation from ethanol afforded benzaldehyde **49** as a cream coloured solid (35.0 g, 72 %). mp 143-145 C. Rf = 0.28 (petrol: EtOAc 1:1. H (300 MHz) 3.95 (3 H, s, OCH3), 7.12 (1 H, d, J = 8.7, H-5), 7.47 (1 H, d, J = 1.9, H-2), 7.70 (1 H, dd, J = 8.5, 2.0, H-6), 9.82 (1 H, s, CHO). C (100 MHz) 56.9 (CH3), 105.4 (m, C), 112.6 (CH), 117.2 (CH), 121.3 (qm, J = 274.3, C), 130.3 (d, J = 10.6, CH), 138.4 (m, C), 141.2 (dm, J = 253.0, C), 145.1 (dm, J = 145.1, C), 146.1 (C), 155.3 (C), 190.2 (CH). *m/z* (EI+) 368 (M+, 60%), 367 (100%). (Found: C, 48.85; H, 2.0%. C15H7O3F7 requires C, 48.9; H, 1.9%).

***E*-2-(3’,4’,5’-Trimethylphenyl)-3-(3’’-*O*-(2’’’,3’’’,5’’’,6’’’-tetrafluoro-4’’’-trifluoromethylphenyl)-4’’-methoxyphenyl)-prop-2-enoic acid** **(46)**

Cinnamic acid **46** was prepared from benzaldehyde **48** (1.03 g, 2.80 mmol) and 3,4,5-trimethylphenylacetic acid (**42**) (1 g, 5.18 mmol) as in procedure C. Recrystallisation from ethanol gave cinnamic acid **46** as a yellow crystalline solid (550 mg, 37 %). mp 220-222 °C. H (300 MHz, DMSO) 2.11 (3 H, s, CH3), 2.15 [6 H, s, (CH3)2], 3.84 (3 H, s, OCH3), 6.65 (1 H, s, H-2’’), 6.74 (2 H, s, H-2’,6’), 7.11 (2H, s, H-5’’,6’’), 7.60 (1 H, s, olefinic H), 12.40 (1 H, s, OH). max (MeOH) = 276 ( = 9,964). *m/z* (FAB) 528 (M+, 80%), 483 [(M-COOH)+ 55%). (Found: (MH)+ 529.1245; C, 59.1; H, 3.7%. C26H19O4F7 requires (MH)+ 529.1250; C, 59.1; H, 3.6%).

*Z*-1-(3’,4’,5’-Trimethylphenyl)-2-(3’’-O-(2’’’,3’’’,5’’’,6’’’-tetrafluoro-4’’’-trifluoromethylphenyl)-4’’-methoxyphenyl)ethene (53a)

Stilbene **53a** was prepared from cinnamic acid **46** as in procedure D. Flash column chromatography (petrol: EtOAc 40:1) followed by recrystallisation from petrol afforded *cis* stilbene **53a** as a white crystalline solid (686 mg, 81%). mp 93-94 °C. Rf = 0.78 (petrol: EtOAc 9:1). H (300 MHz, DMSO) 2.16 (3 H, s, CH3), 2.20 [6 H, s, (CH3)2], 3.89 (3 H, s, OCH3), 6.39 (1 H, d, *J* = 12.4, olefinic H), 6.48 (1 H, d, *J* = 12.4, olefinic H), 6.81 (1 H, d, *J* = 1.9, H-2’’), 6.85 (2 H, s, H-2’,6’), 6.99 (1 H, d, *J* = 8.3, H-5’’), 7.07 (1 H, dd, *J* = 8.3, 1.9, H-6’’). *m/z* (FAB) 485 [(MH+), 100%]. (Found: (MH)+ 485.1346; C, 62.2; H, 4.0%. C25H19O2F7 requires (MH)+ 485.1351; C, 62.0; H, 3.95%).

**3-(2’,3’,5’,6’-tetrafluoropyridoxy)-4-methoxybenzaldehyde** **(49)**

Benzaldehyde **49** was prepared from 3-hydroxy-4-methoxybenzaldehyde (20 g, 0.132 mol) and pentafluoropyridine (21.95 ml, 0.209 mol) as in by the method decribed for the synthesis of **48**. Recrystallisation from ethanol afforded the title benzaldehyde **49** as a cream coloured solid (35.2 g, 89%). mp 144-146 C. Rf = 0.27 (petrol: EtOAc 1:1). H (400 MHz) 3.95 (3 H, s, OCH3), 7.15 (1 H, d, J = 8.5, H-5), 7.68 (1 H, d, J = 2.0, H-2), 7.79 (1 H, dd, J = 8.5, 2.0, H-6), 9.87 (1 H, s, CHO). C (100 MHz) 67.0 (CH3), 112.7 (CH), 119.3 (CH), 130.4 (C), 130.6 (CH), 135.5 (dm, J = 243.4, C), 142.0 (d, J = 7.7, C), 144.3 (dm, J = 243.4, C), 145.0 (C), 155.5 (C), 190.1 (CH). *m/z* (EI+) 301 (M+, 75%), 300 (100%). (Found: C, 51.9; H, 2.3; N, 4.5; C13H7O3NF3 requires C, 51.8; H, 2.3; N, 4.65%).

***E*-2-(3’,4’,5’-Trimethylphenyl)-3-(3’’-(2’’’,3’’’,5’’’,6’’’-tetrafluoropyridoxy)-4’’-methoxyphenyl)prop-2-enoic acid** **(47)**

Cinnamic acid **47** was prepared from aldehyde **49** (2 g, 6.64 mmol) and 3,4,5-trimethylphenylacetic acid (**42**) (2.37 g, 13.3 mmol) as in procedure C. Recrystallisation from ethanol afforded cinnamic acid **47** as a yellow crystalline solid (700 mg, 23%). mp 184-186 °C. H (300 MHz, DMSO) 2.11 (3 H, s, CH3), 2.14 [6 H, s, (CH3)2], 3.83 (3 H, s, OCH3), 6.61 (1 H, d, *J* = 1.5, H-2’’), 6.71 (2 H, s, H-2’,6’), 7.13 (1 H, d, J = 8.7, H-5’’), 7.19 (1 H, dd, J = 8.7, 1.5, H-6’’), 7.61 (1 H, s, olefinic H), 12.52, (1 H, s OH). max (MeOH) = 279 ( = 12,974). *m/z* (FAB) 460 (M+, 100%). (Found: (MH)+ 461.1251; C, 62.6; H, 4.0; N, 2.9%. C24H19O4NF4 requires (MH)+ 461.1250; C, 62.5; H, 4.15; N, 3.0%).

***Z*-1-(3’,4’,5’-Trimethylphenyl)-2-(3’’-(2’’’,3’’’,5’’’,6’’’-tetrafluoropyridoxy)-4’’-methoxyphenyl)ethene** **(54a)**

*Cis* stilbene **54** was prepared from cinnamic acid **47** (700 mg, 1.52 mmol) as in procedure D. Flash column chromatography (petrol: EtOAc 9:1) afforded stilbene **54** as a yellow oil (224 mg, 35 %). Rf = 0.48 (petrol: EtOAc 9:1). H (300 MHz) 2.15 (3 H, s, CH3), 2.19 [6 H, s, (CH3)2], 3.84 (3 H, s, OCH3), 6.41 (1 H, d, *J* = 12.1, olefinic H), 6.51 (1 H, d, *J* = 12.1, olefinic H), 6.87 (2 H, s, H-2’,6’), 6.89 (1 H, d, *J* = 8.7, H-5’’), 6.98 (1 H, d, *J* = 2.3, H-2’’), 7.11 (1 H, dd, *J* = 8.7, 2.3, H-6’’). *m/z* (FAB) 417 (M+, 100%). (Found: M+ 417.1345. C23H19O2NF4 requires M+ 417.1352).

***Z*-1-(3’,4’,5’-Trimethylphenyl)-2-(3’’-hydroxy-4’’-methoxyphenyl)-ethene** **(52a)**

Sodium methoxide (25 mg, 0.463 mmol) was added to a solution of stilbene **54** (100 mg, 0.24 mmol) in dry DMF (600 l) and dichloromethane (115 l) at 0 C. After stirring overnight, the mixture was partitioned between ether (5 ml) and 1 M sulfuric acid (5 ml). The organic phase was separated, washed with water (5 ml), dried (MgSO4) and concentrated *in vacuo*. Flash column chromatography (petrol:EtOAc 9:1) and recrystallisation from petrol afforded phenol **52** as a white crystalline solid (31 mg, 48 %). mp 60-61 °C. Rf = 0.39 (petrol: EtOAc 4:1). H (300 MHz) 2.16 (3 H, s, CH3), 2.21 [6 H, s, (CH3)2], 3.90 (3 H, s, OCH3), 5.50 (1 H, s, OH), 6.40 (1 H, d, *J* = 12.4, olefinic H), 6.45 (1 H, d, *J* = 12.4, olefinic H), 6.72 (1 H, d, *J* = 8.3, H-5’’), 6.82 (1 H, dd, *J* = 8.3, 2.3, H-6’’), 6.91 (1 H, d, *J* = 2.3, H-2’’), 6.96 (2 H, s, H-2’); *m/z* (FAB) 268 (M+, 100%). (Found: M+ 268.1469. C18H20O2 requires M+ 268.1463).

#### Biochemistry

The stilbenes were tested for cytotoxicity using the previously published MTT assay31. Cell cycle analysis, measurement of the inhibition of tubulin, the colchicine displacement assays and immunohistochemistry were carried out as previously published7. The HUVEC assay was carried out as previously described20.

**References**

7 J. A. Woods, J. A. Hadfield, A. T. McGown, G. R. Pettit and B. W. Fox, *B. J. Cancer,* 1995, **71**, 705

20 M. E.Watts and M. Woodcock, *Eur. J. Cancer*, 1992, **28A**, 1628

22 K. Ohsumi, R. Nakagawa, Y. Fukuda, T. Hatanaka, M. Toshihiro, Y. Nihei, K. Ohishi, Y. Suga, Y. Akiyama and T. Tsuji, *J. Med. Chem.*, 1998, **41**, 3022

23 N. J. Lawrence, L. A. Hepworth, D Rennison, A. T. McGown and J. A. Hadfield, *J. Flourine Chem.*, in the press

24 G. R. Pettit, S. B. Singh, M. L. Niven, E. Hamel and J. M.Schmidt, *J. Nat. Prod.*, 1987, **50**, 119

25 Copper bronze from Aldrich Chemical Company catalogue No. 29,258-3

26 S. B.Singh and G. R. Pettit, *J. Org. Chem*., 1989, **17**, 4105

27 N. J. Lawrence and M. Faiz, *Tetrahedron*, 1998, **54**, 15361

28 H. Nozaki, I. Otani, R. Noyori and M. Kawanisi, *Tetrahedron*, 1968, **24**, 2183

29 T. P. Schultz, W. D. Boldin, T. H. Fisher, D. D. Nicholas, K. D. McMurtrey and K. Pobanz, *Phytochemistry*, 1992, **31**, 3801

30 J. E. Sinsheimer and R. V. Smith, *Biochem. J.*, 1969, **111**, 35

31 J. M. Edmondson, L. S. Armstrong and A. O. Martinez, *J. Tissue Cult. Methods*, 1988, **11**, 15
